# Supplementary material for: Biochars obtained from arabica coffee husks by a pyrolysis process: characterization and application in Fe(ii) removal in aqueous systems
Source: Royal Society of Chemistry journal article supplement (doi:10.1039/c9nj04144c), 2020-01-01
Supplement: c9nj04144c1.pdf [file c9nj04144c1.pdf]

**Biochars obtained from arabica coffee husk by a pyrolysis  
process: characterization and application in the Fe(II) removal  
in aqueous systems**

Tiago Guimarães <sup>a</sup>; Ana Paula de Carvalho Teixeira <sup>b</sup>, André Fernando de Oliveira <sup>a</sup>; and  
**Renata P. Lopes<sup>a\*</sup>**.

<sup>a</sup> Federal University of Viçosa, Chemistry Department - Viçosa/MG, Brazil, CEP: 36570-000

<sup>b</sup> Federal University of Minas Gerais, Chemistry Department - Belo Horizonte/MG, Brazil, CEP:  
31270-901

\*[renataplopes@ufv.br](mailto:renataplopes@ufv.br)

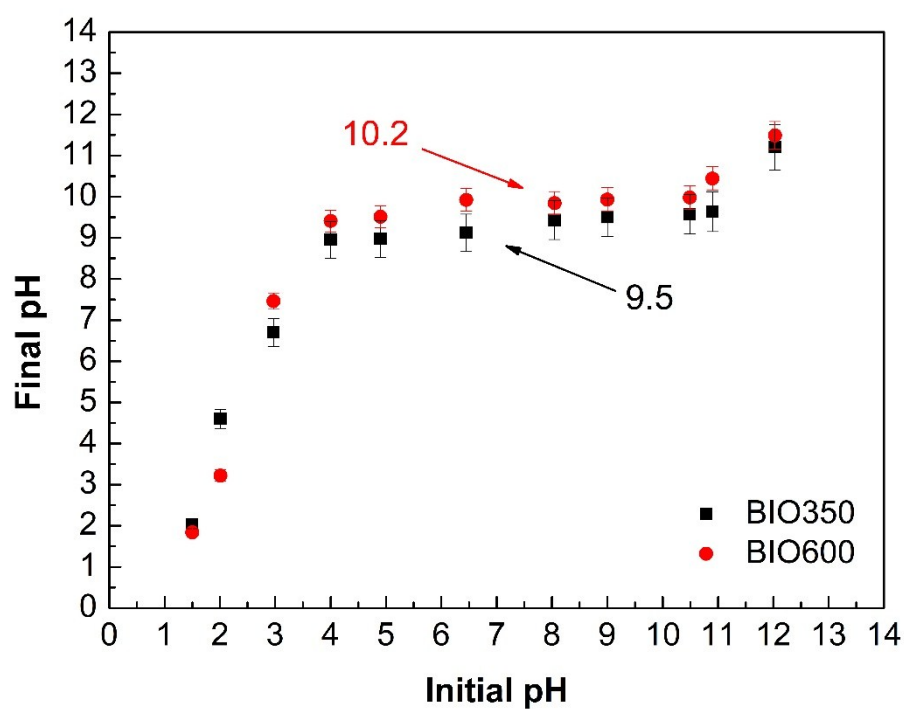

**Figure S1.** Point of Zero Charge of BIO350 and of BIO600. Experimental conditions: 50 mL of 0.1 mol/L NaCl; 24 hours of resting time; 0.1 g of material.

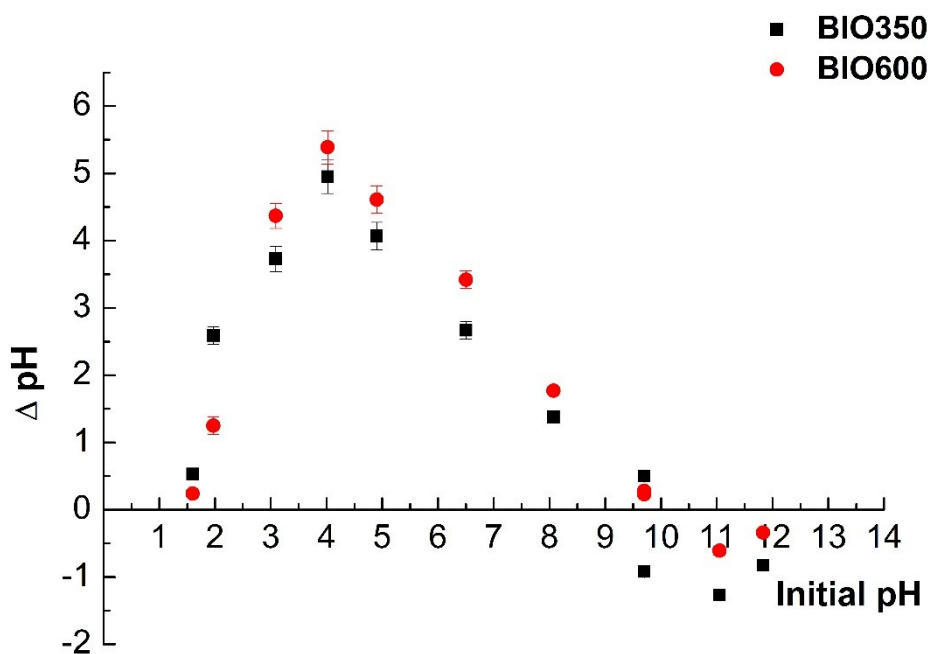

**Figure S2.**  $\Delta$ pH versus initial pH.

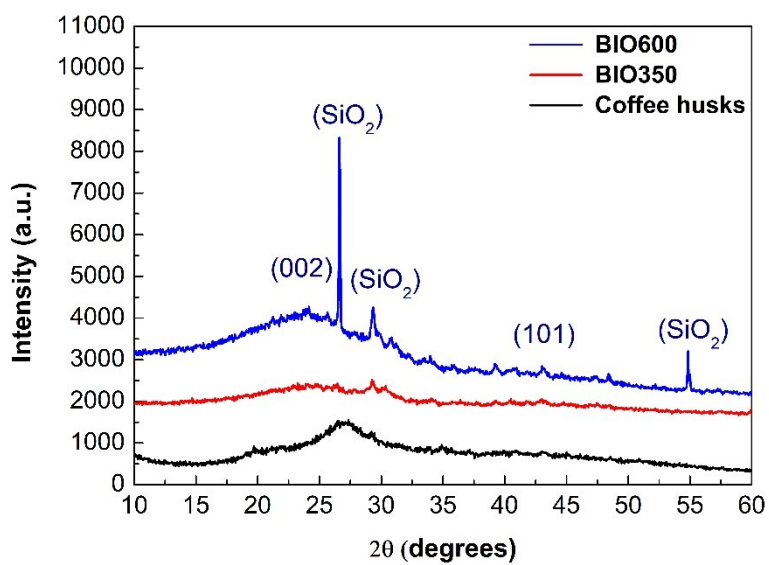

**Figure S3.** X-ray diffractograms of *in natura* coffee husks, BIO350 and BIO600.

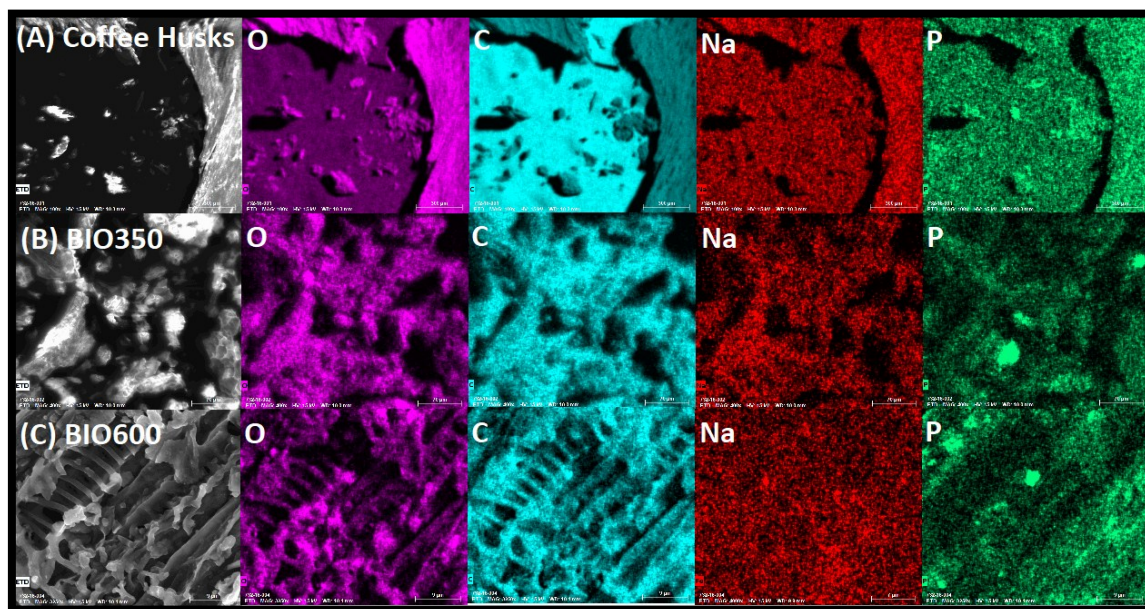

**Figure S4.** Images and chemical mapping using EDS for (A) *in natura* coffee husks, (B) BIO350, and (C) BIO600.

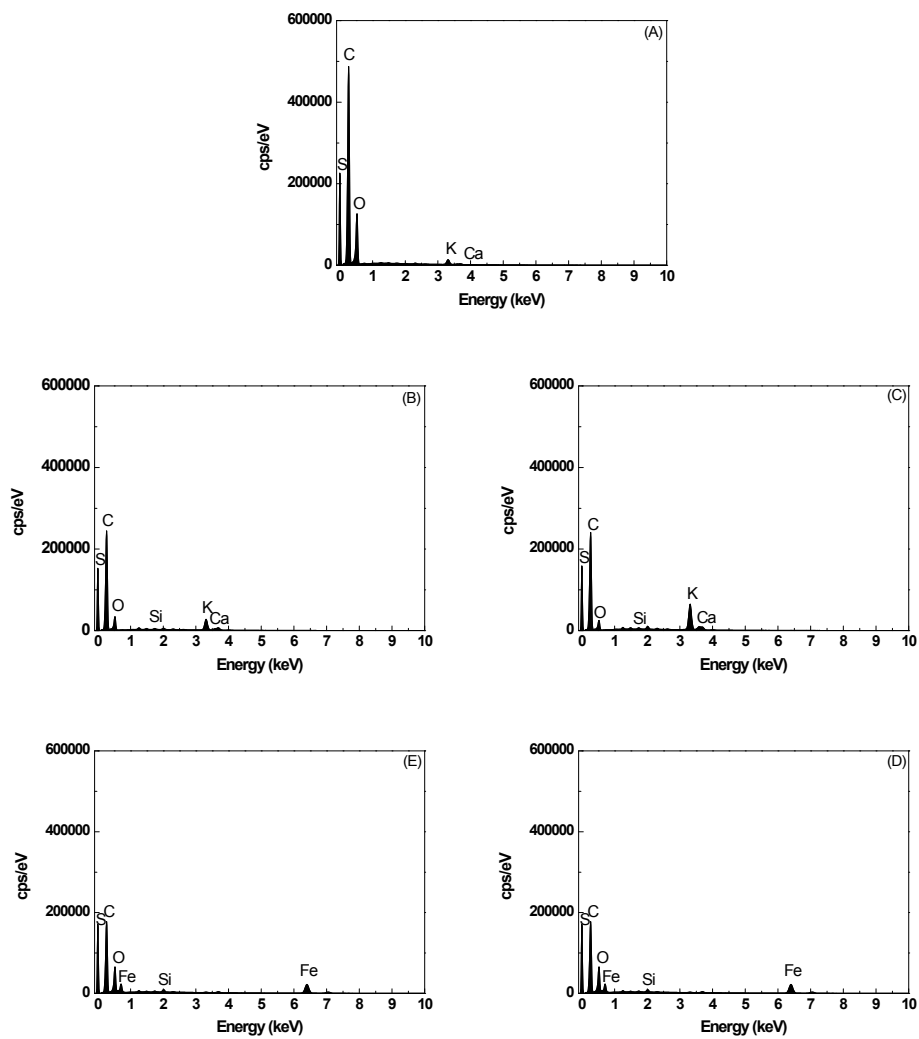

**Figure S5.** EDS spectrum for (A) *in natura* coffee husks, (B) BIO350, (C) BIO600, (D) BIO350Fe(II), and (E) BIO600Fe(II).

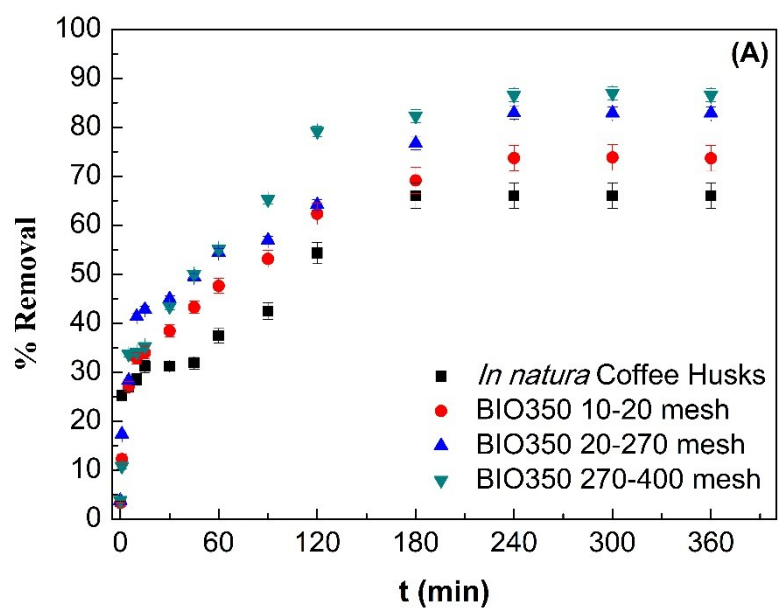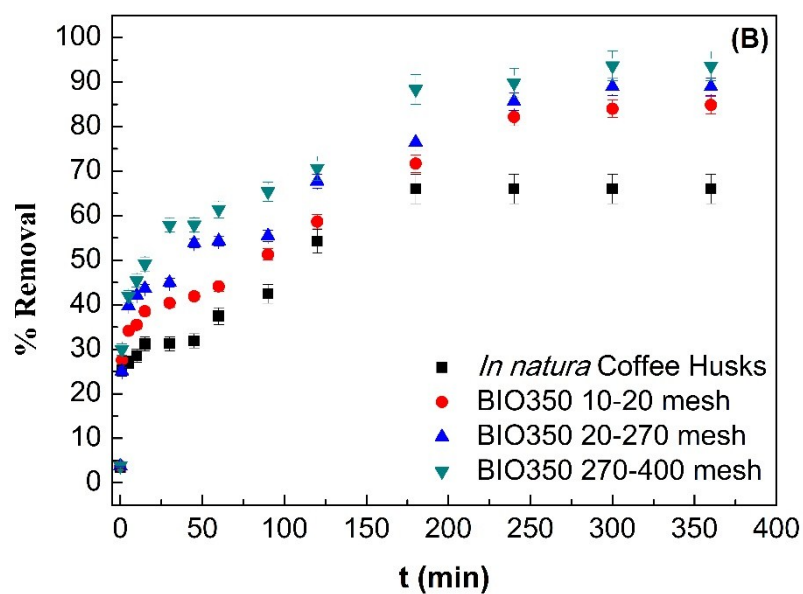

**Figure S6.** Granulometry effect on Fe(II) removal by biochars from arabica coffee husks (*Coffea arabica*); BIO350 (A) and BIO600 (B). Experimental conditions: 100 mL of Fe(II) solution 150 mg/L; 0.1 g of material; pH=4.8; 25 °C.

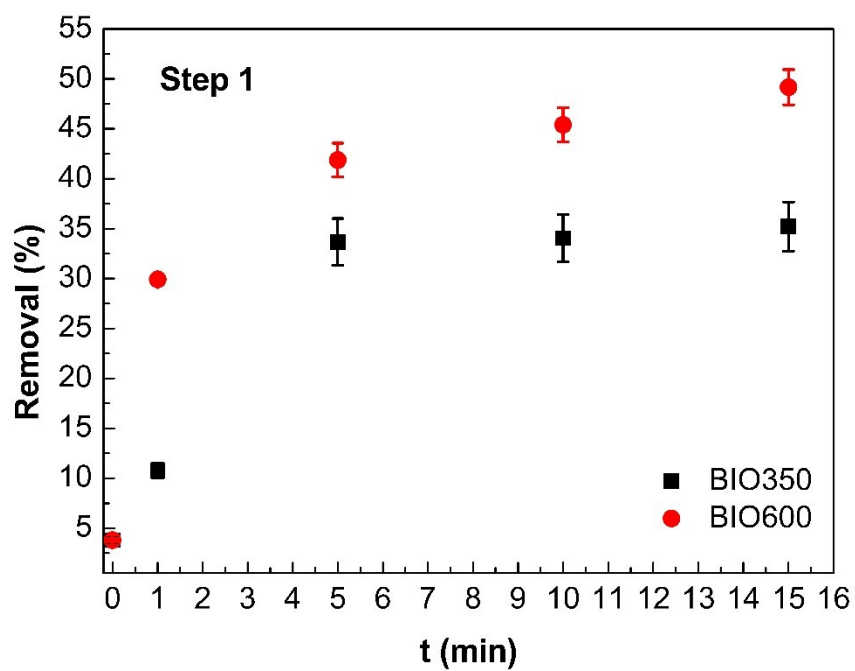

**Figure S7.** Removal of Fe(II) using biochars from arabica coffee husks (*Coffea arabica*). (270-400 mesh). Experimental conditions: 100 mL of Fe(II) solution 95 mg/L; 0.1 g of biochar; pH=4.8; 298 K, Step 1 (time from 0 to 15 minutes).

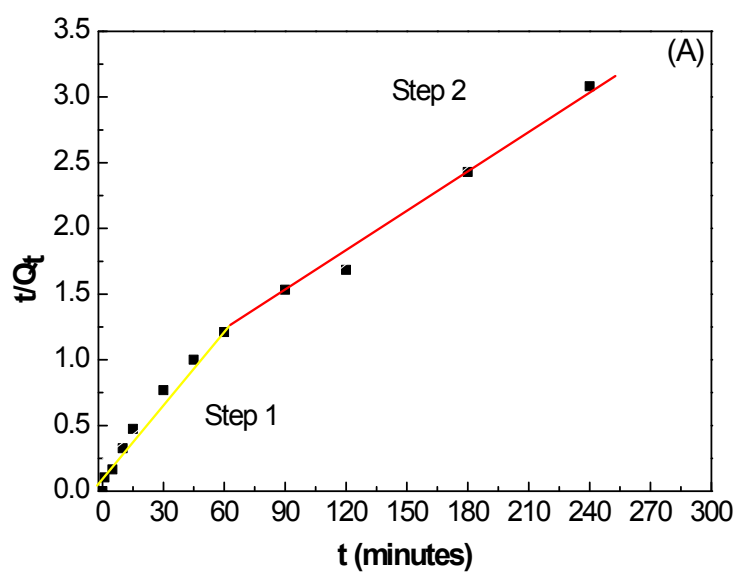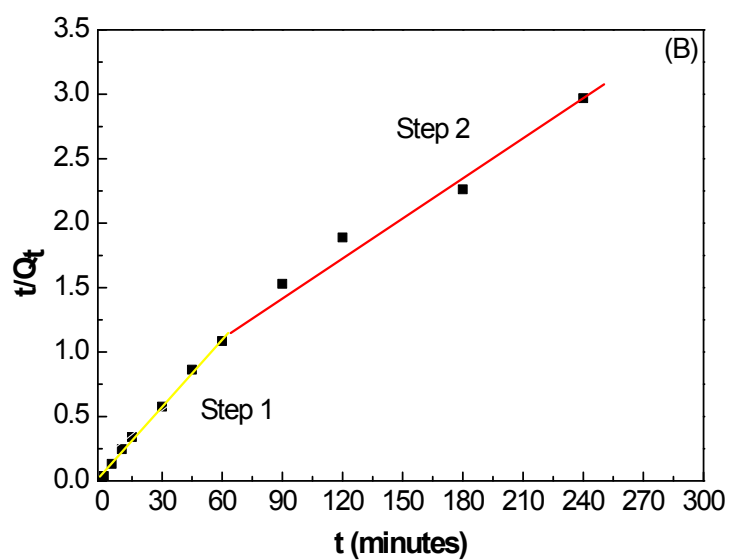

**Figure S8.** Adsorption kinetics, pseudo-second order model fitting (Step 2) for (A) BIO350 and (B) BIO600.

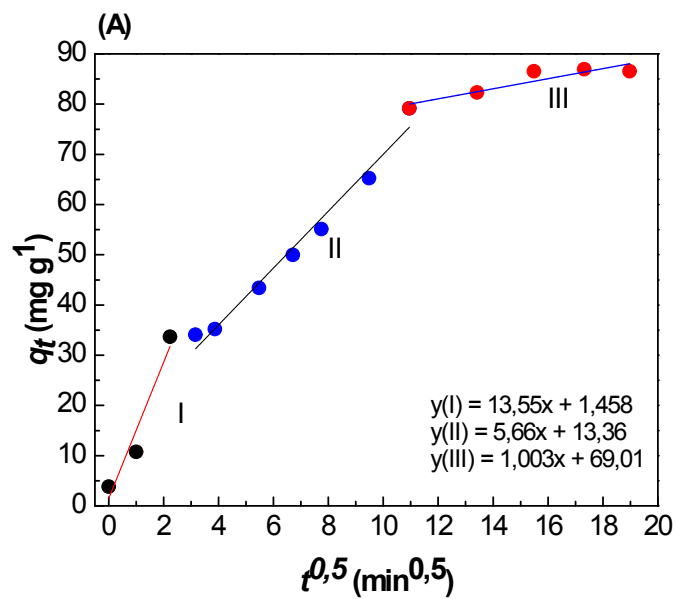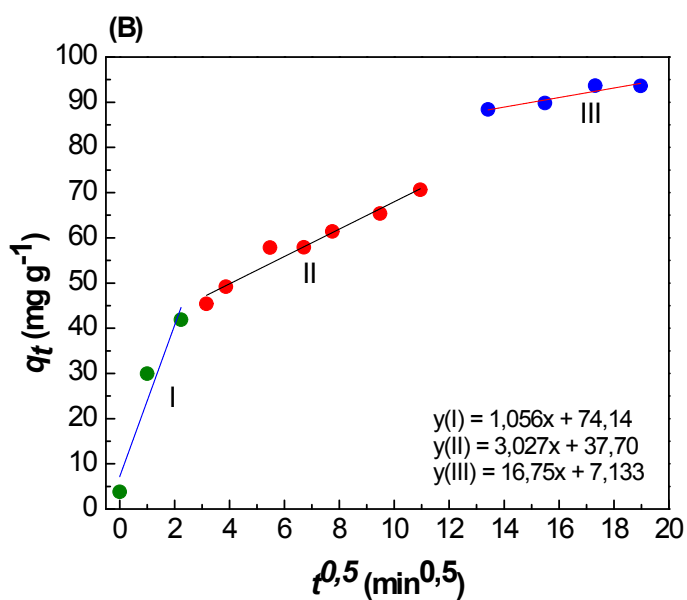

**Figure S9.** Adsorption kinetics, intra particle diffusion model fitting for (A) BIO350 and (B) BIO600.



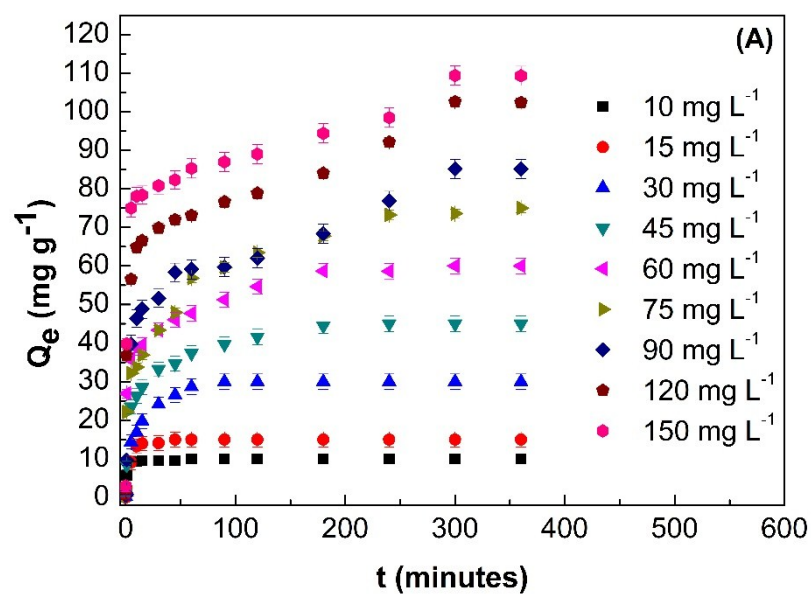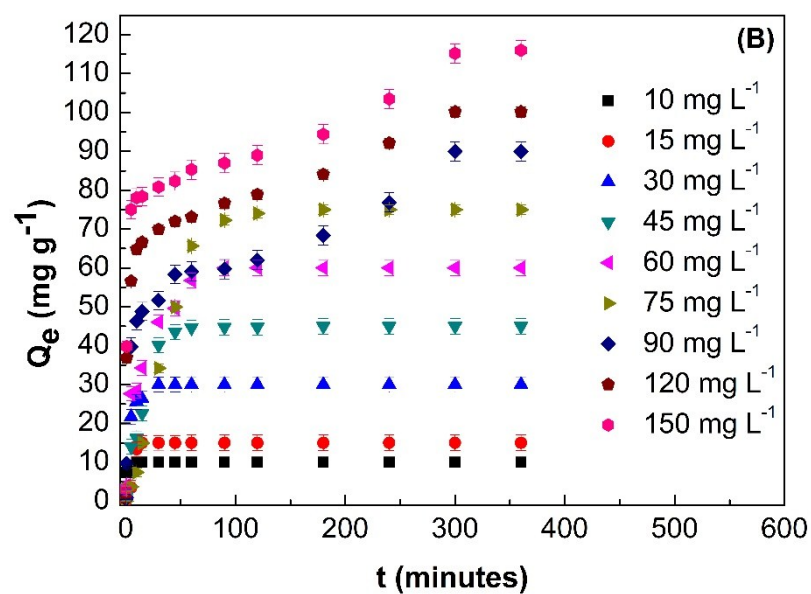

**Figure S10.** Maximum adsorption capacity of Fe(II) on biochars BIO350 (A) and BIO600 (B). Experimental conditions: 100 mL of Fe(II) solution; 0.1 g of material (270-400 mesh); pH=4.8; 25 °C.

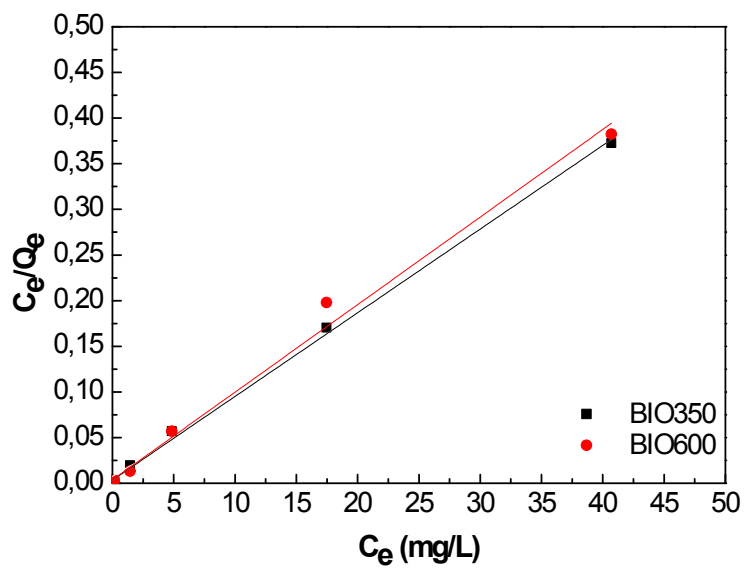

**Figure S11.** Adsorption isotherm, Langmuir model fitting for both the biochars.

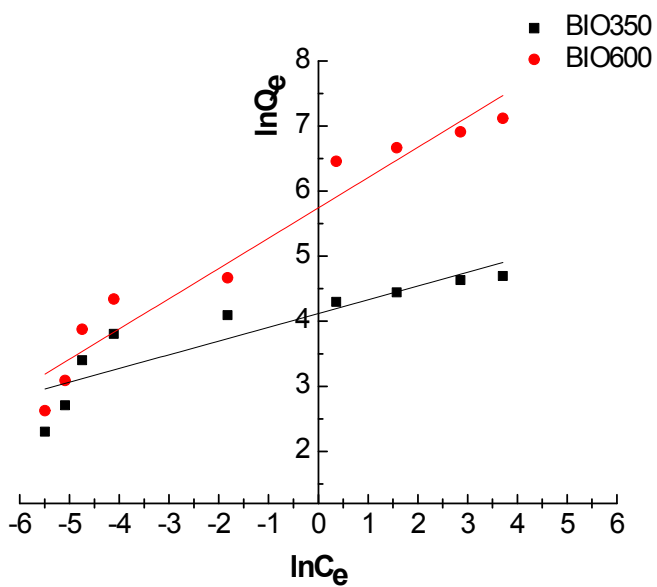

**Figure S12.** Adsorption isotherm, Freundlich model fitting for both the biochars.

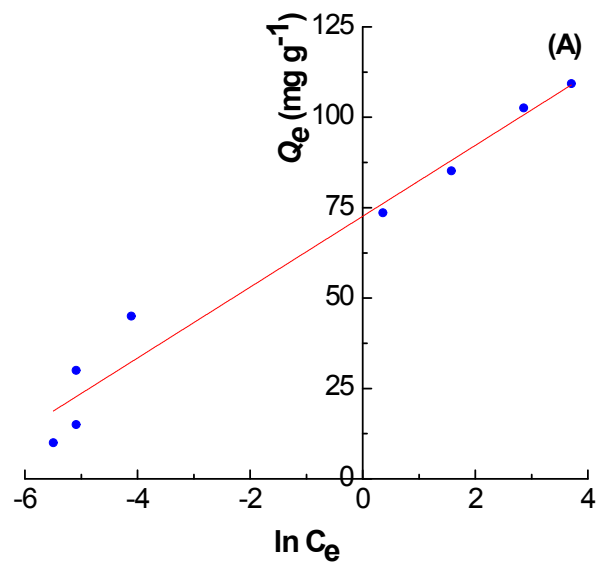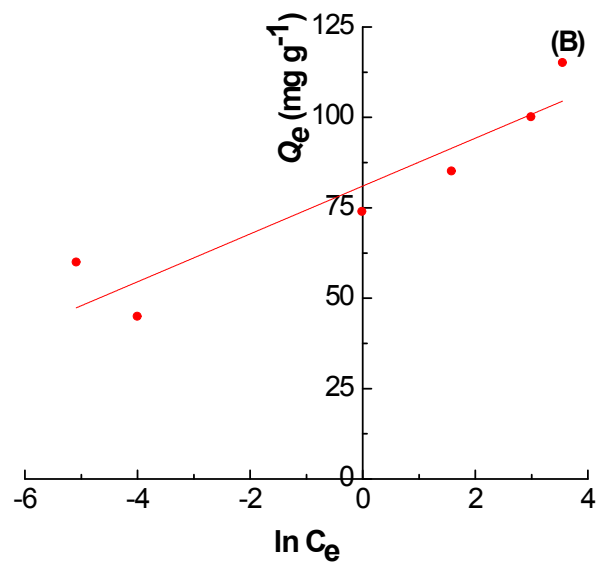

**Figure S13.** Adsorption isotherm, Temkin model fitting for (A) BIO350 and (B) BIO600.

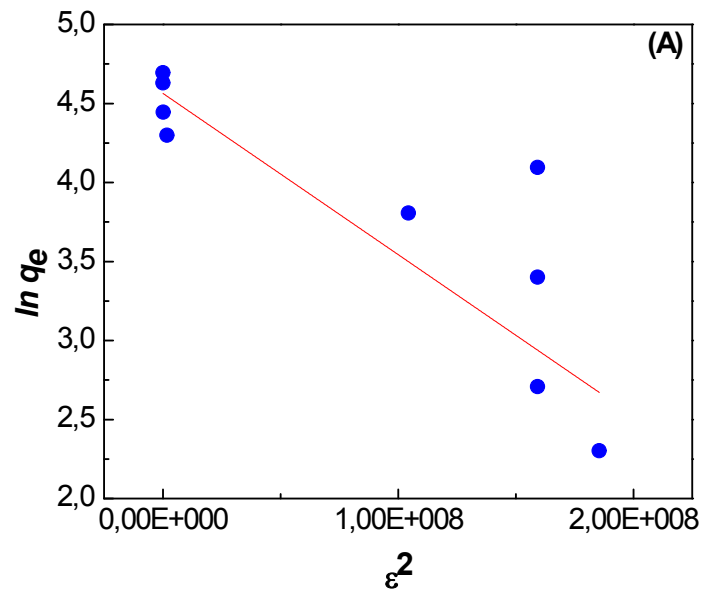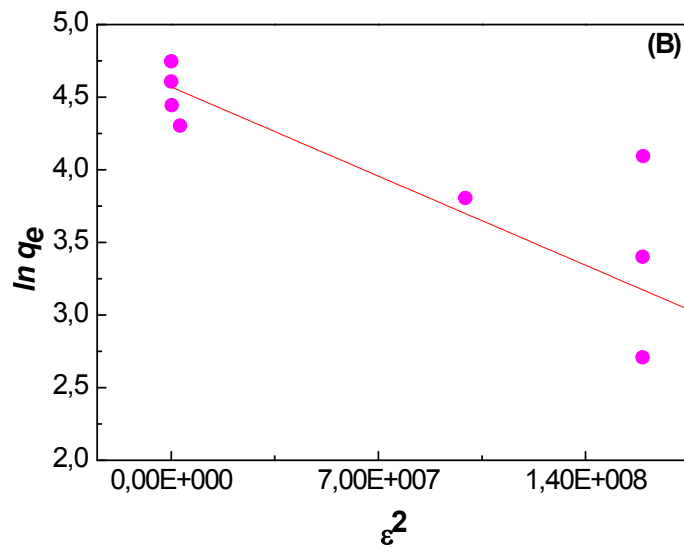

**Figure S14.** Adsorption isotherm, Dubinin-Raduskevich model fitting for (A) BIO350 and (B) BIO600.

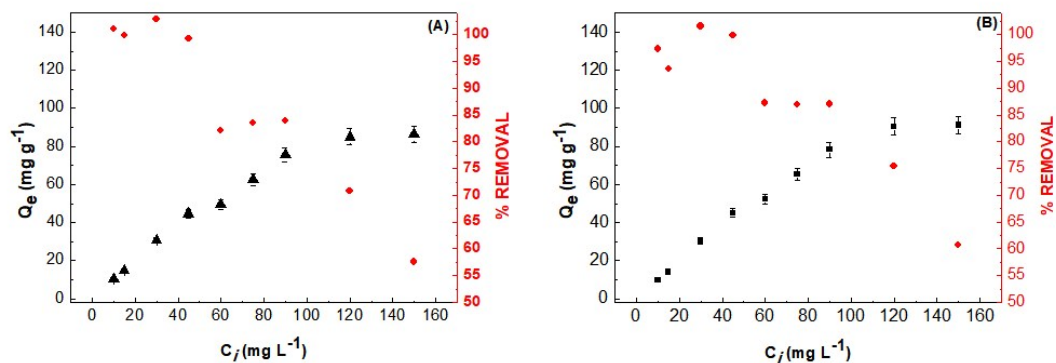

**Figure S15.** Maximum capacity and % of Fe(II) adsorption on biochars from arabica coffee husks (*Coffea arabica*). Experimental conditions: 100 mL of Fe(II); 0.1 g of (A) BIO350 and (B) BIO600; pH=4.8; 288 K.

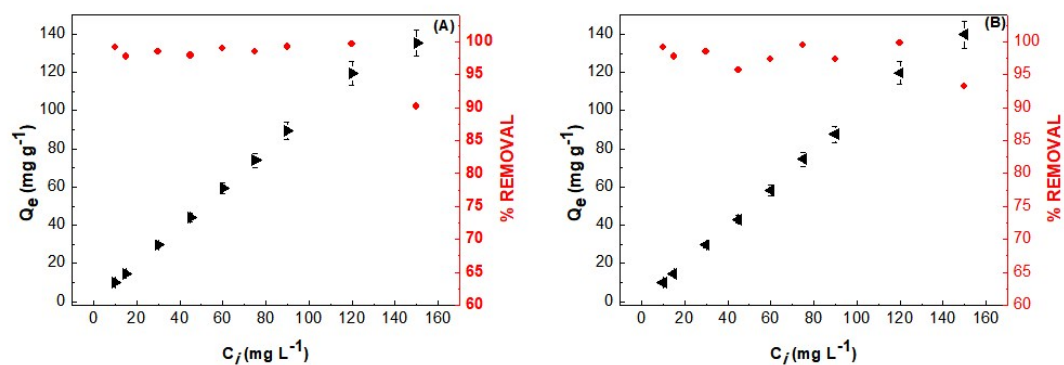

**Figure S16.** Maximum capacity and % of Fe(II) adsorption on biochars from arabica coffee husks (*Coffea arabica*). Experimental conditions: 100 mL of Fe(II); 0.1 g of (A) BIO350 and (B) BIO600; pH=4.8; 308 K.

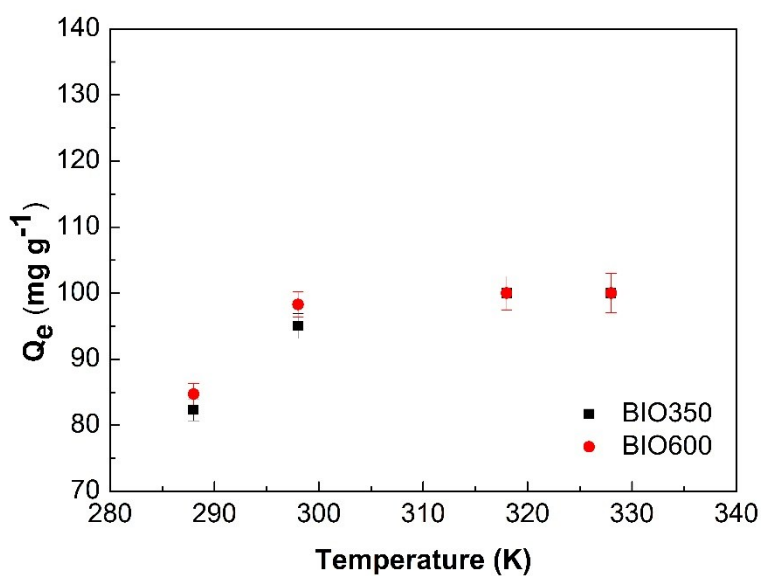

**Figure S17.** Maximum adsorption capacity of Fe(II) a function of temperature (A) BIO350 and (B) BIO600. Experimental conditions: 100 mL Fe(II) solution 100 mg/L; 0.1 g of material; pH=4.8; 3 hours.

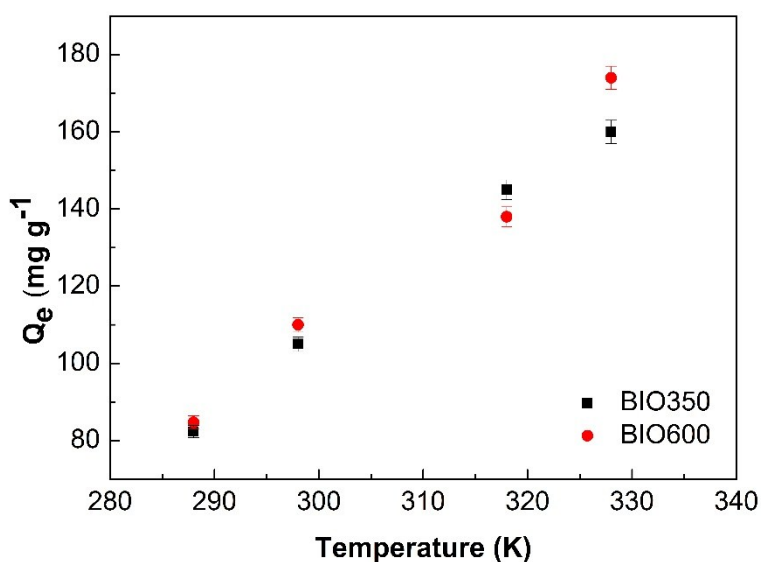

**Figure S18.** Maximum adsorption capacity of Fe(II) a function of temperature (A) BIO350 and (B) BIO600. Experimental conditions: 100 mL Fe(II) solution 200 mg/L; 0.1 g of material; pH=4.8; 3 hours.

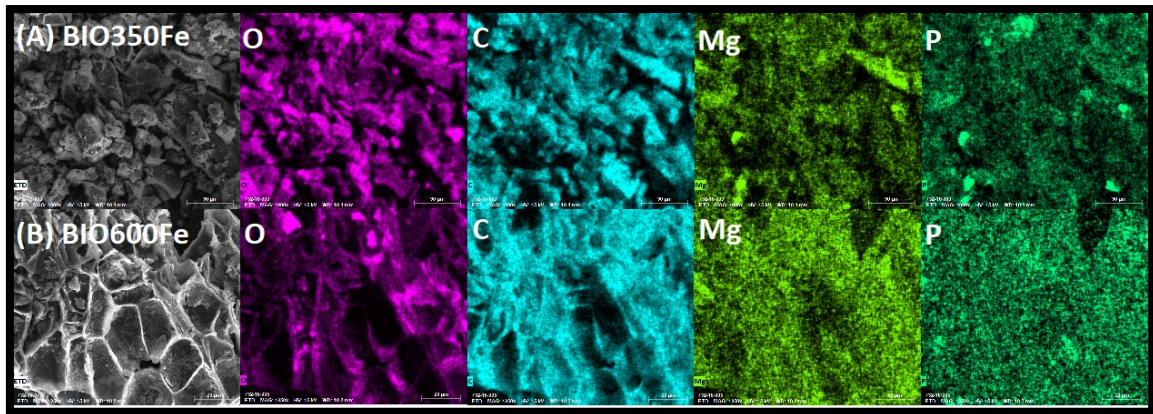

**Figure S19.** Images and chemical mapping using EDS for (A) BIO350Fe, and (B) BIO600Fe.
